# Supplementary material for: A Dynamic Database of Microarray-Characterized Cell Lines with Various Cytogenetic and Genomic Backgrounds
Source: PubMed Central journal article supplement (PMC3704242; doi:10.1534/g3.113.006577), 2013-07-01
Supplement: supp_g3.113.006577_TableS2.pdf [file supp_g3.113.006577_TableS2.pdf]

**Table S2 Copy Number Variation Panel - CNVPANEL01 (<http://ccr.coriell.org/Sections/Collections/NIGMS/cnvpanel01.aspx?pgid=729&coll=GM>)**

| Catalog ID | Cell Type    | Description                                             | Short ISCN                                                                                                                        | Gender | Family |
|------------|--------------|---------------------------------------------------------|-----------------------------------------------------------------------------------------------------------------------------------|--------|--------|
| GM01201    | B-Lymphocyte | ANEUPLOID CHROMOSOME NUMBER - NON-TRISOMIC              | 45,XX,-21.arr[hg18] 21q11.2q22.3(13322592-46921373)x1                                                                             | Female |        |
| GM01416    | B-Lymphocyte | XXXX SYNDROME                                           | 48,XXXX.arr[hg18](X)x4,(Y)x0                                                                                                      | Female | 370    |
| GM05067    | B-Lymphocyte | ANEUPLOID CHROMOSOME NUMBER - TRISOMY 9                 | 47,XY,+del(9)(q11)mat.arr[hg18] 9p24.3p11.2(36587-44806024)x3                                                                     | Male   | 602    |
| GM05966    | B-Lymphocyte | DERIVATIVE CHROMOSOME                                   | 46,XY,dup(14)(q22q24).arr[hg18] 14q22.2q24.3(54038516-75217413)x3                                                                 | Male   |        |
| GM06226    | B-Lymphocyte | TRANSLOCATED CHROMOSOME                                 | 46,XY,der(1)t(1;16)(q44;p12)mat.arr[hg18] 1q44(245373155-247190999)x1,16p13.3p12.2(25815-21297471)x3,16p12.1(21853546-22612021)x3 | Male   | 932    |
| GM06870    | B-Lymphocyte | ANEUPLOID CHROMOSOME NUMBER - NON-TRISOMIC              | 47,XX,+i(18)(p10).arr[hg18] 18p11.32p11.21(1543-15391751)x4                                                                       | Female | 966    |
| GM06936    | B-Lymphocyte | CHROMOSOME DELETION                                     | 46,XX,del(10)(p13).arr[hg18] 10p15.3p13(94427-12918932)x1                                                                         | Female | 974    |
| GM07945    | B-Lymphocyte | ADENOSINE DEAMINASE DEFICIENCY WITH NO IMMUNODEFICIENCY | 46,XY,del(20)(q12q13.1).arr[hg18] 13q12.11(19701062-19932295)x1,20q11.22q13.12(32961915-44293878)x1                               | Male   |        |
| GM08331    | B-Lymphocyte | CHROMOSOME DELETION                                     | 46,XY,del(13)(q32q33).arr[hg18] 13q32.1q33.3(96956971-109061570)x1                                                                | Male   |        |
| GM09102    | B-Lymphocyte | CHROMOSOME DELETION                                     | 46,XY,del(11)(q23.3).arr[hg18] 11q23.3q25(119996189-134449982)x1,22q11.21(17008946-17386984)x3                                    | Male   |        |
| GM09216    | B-Lymphocyte | CHROMOSOME DELETION                                     | 46,XY,del(2)(p25.1p23).arr[hg18] 2p25.1p23.3(10260988-27005382)x1,4q31.22(145061542-145162384)x1                                  | Male   | 2124   |
| GM09367    | B-Lymphocyte | DUPLICATED CHROMOSOME                                   | 46,XX,dup(6)(q21q24).ish dup(6)(q21q24)(wcp6+).arr[hg18] 6q21q24.2(107861056-143105847)x3                                         | Female |        |

|         |              |                                                                               |                                                                                                                                                                     |        |      |
|---------|--------------|-------------------------------------------------------------------------------|---------------------------------------------------------------------------------------------------------------------------------------------------------------------|--------|------|
| GM09888 | B-Lymphocyte | TRICHORHINOPHALANGEAL SYNDROME, TYPE II; TRPS2 (LANGER-GIEDION SYNDROME; LGS) | 46,XX,del(8)(q23q24.1).arr[hg18] 1q23.3(159775402-159923110)x3,8q23.1q24.12(107189214-119363784)x1,14q22.1(49891851-50724999)x1,22q11.21(17256416-17420071)x3       | Female |      |
| GM10608 | B-Lymphocyte | CHROMOSOME DELETION                                                           | 46,XY,del(20)(p12p11.2).arr[hg18] 20p12.2p11.23(9820603-17979469)x1                                                                                                 | Male   |      |
| GM10636 | B-Lymphocyte | DUPLICATED CHROMOSOME                                                         | 46,X,dup(X)(p11.4p11.1).ish dup(X)(p11.4p11.1)(STS+,DXZ1++,wcpX+).arr[hg18] Xp11.4p11.1(39693535-57973515)x3,2q13(109819773-111343893)x3                            | Female |      |
| GM10800 | B-Lymphocyte | CHROMOSOME DELETION                                                           | 46,XY,del(4)(q13.2q22).arr[hg18] 4q13.2q22.2(70096438-95297116)x1                                                                                                   | Male   |      |
| GM10925 | B-Lymphocyte | GREIG CEPHALOPOLYSYNDACTYLY SYNDROME; GCPS                                    | 46,XY,del(7)(p14p12).arr[hg18] 7p14.1p11.2(38598541-54681998)x1                                                                                                     | Male   | 1313 |
| GM10985 | B-Lymphocyte | CHROMOSOME DELETION                                                           | 46,XX,del(3)(p25).arr[hg18] 3p26.3p25.3(35333-10305377)x1                                                                                                           | Female |      |
| GM10989 | B-Lymphocyte | GILLES DE LA TOURETTE SYNDROME; GTS                                           | 46,XY,del(9)(p23).ish del(9)(p23)(9ptel30-,D9Z+,wcp9+).arr[hg18] 9p24.3p23(36587-11986831)x1                                                                        | Male   | 1316 |
| GM11213 | B-Lymphocyte | CHROMOSOME DELETION                                                           | 46,XX,del(2)(q32.1q33).arr[hg18] 2q32.1q33.2(186818448-204311174)x1                                                                                                 | Female |      |
| GM11419 | B-Lymphocyte | ANEUPLOID CHROMOSOME NUMBER - NON-TRISOMIC                                    | 49,XYYYY.arr[hg18] Xp22.33(109805-2704240)x4,Xq28(154616633-154887040)x4,Yp11.31q12(2712722-27209311)x4,4q31.22(145040166-145270061)x3                              | Male   | 1383 |
| GM11672 | B-Lymphocyte | CHROMOSOME DELETION                                                           | 46,XY,del(10)(q11.2q22.1).arr[hg18] 10q11.22q22.2(48962457-75120713)x1                                                                                              | Male   |      |
| GM12606 | B-Lymphocyte | CHROMOSOME DELETION                                                           | 47,XY,+del(13)(q21.2).arr[hg18] 13q11q21.2(17943628-59139422)x3                                                                                                     | Male   |      |
| GM12662 | B-Lymphocyte | CHROMOSOME DELETION                                                           | 46,dup(X)(q28),del(Y)(q11.2).ish del(Y)(q11.2)(DXYS129/DXYS153+,SRY+,DYZ3+,DYZ1+,Z43206+).arr[hg18] Xq28(151659961-154582680)x2,Yq11.223q11.23(22769319-27097245)x0 |        |      |
| GM13019 | B-Lymphocyte | TURNER SYNDROME                                                               | 46,X,idel(X)(p10)[25]/46,X,del(X)(p10)[16]/45,X[9].arr[hg18] Xp22.33p11.1(108464-56912309)x1,Xp11.1q28(62260103-153703648)x2~3                                      | Female |      |
| GM13464 | B-Lymphocyte | WILLIAMS-BEUREN SYNDROME; WBS                                                 | 46,XY.ish del(7)(q11.23q11.23)(ELN-).arr[hg18] 7q11.23(72363697-73780028)x1                                                                                         | Male   |      |

|         |              |                                       |                                                                                                                                                                                                         |        |      |
|---------|--------------|---------------------------------------|---------------------------------------------------------------------------------------------------------------------------------------------------------------------------------------------------------|--------|------|
| GM13476 | B-Lymphocyte | SMITH-MAGENIS SYNDROME; SMS           | 46,XX,ish del(17)(p11.2p11.2)(D17S29-).arr[hg18] 17p11.2(16704280-20336467)x1                                                                                                                           | Female |      |
| GM13783 | B-Lymphocyte | TRISOMY 21                            | 47,XX,+21.arr[hg18] 21q11.2q22.3(13286389-46887579)x3                                                                                                                                                   | Female |      |
| GM14164 | B-Lymphocyte | TETRALOGY OF FALLOT                   | 46,XX,del(13)(q13q32).ish del(13)(q13q32)(RB1-,D13S102+).arr[hg18] 13q14.2q32.1(46700085-94512977)x1,22q11.21(17256416-17405213)x3                                                                      | Female |      |
| GM14485 | B-Lymphocyte | INVERTED DUPLICATION DELETION         | 46,XY,der(8)del(8)(p23.1)dup(8)(p23.1p11.2).ish der(8)del(8)(p23.1)dup(8)(p23.1p11.2)(wcp8+,D8S596-).arr[hg18] 8p23.3p23.1(160290-7213701)x1,8p23.1p11.1(12572787-43719525)x3                           | Male   |      |
| GM14943 | B-Lymphocyte | CHROMOSOME DELETION                   | 46,XY,del(2)(q37.1).ish del(2)(q37.1q37.3)(D2S447-,D2Z4-).arr[hg18] 2q37.1q37.3(234941780-242738117)x1                                                                                                  | Male   | 1809 |
| GM15603 | B-Lymphocyte | UNIPARENTAL DISOMY CHROMOSOME 8       | 46,XY.arr[hg18] 8p23.3q24.3(103564-1457732553)x2 h mz                                                                                                                                                   | Male   |      |
| GM16362 | B-Lymphocyte | ANEUPLOID CHROMOSOME NUMBER - TRISOMY | 47,XY,+del(22)(q11.2q13.3).ish del(22)(q11.2q13.3)(D22Z1+,TUPLE1-,EWSR1-,ARSA+,D22S1726+).arr[hg18] 22q11.1q11.21(15847411-20903975)x3,22q11.22(20645077-20903975)x1,22q13.2q13.33(41609558-49581309)x3 | Male   | 1925 |
| GM16595 | B-Lymphocyte | CRI-DU-CHAT SYNDROME                  | 46,XX,del(5)(p15.2p14).ish del(5)(p15.2p14)(C84C11T7+,D5S721-,D5S23-,EGR1+).arr[hg18] 5p15.2p14.2(8686804-24072399)x1                                                                                   | Female |      |
| GM17867 | B-Lymphocyte | XXY SYNDROME; KLINEFELTER SYNDROME    | 47,XXY.arr[hg18](X)x2,(Y)x1                                                                                                                                                                             | Male   |      |
| GM17942 | B-Lymphocyte | DIGEORGE SYNDROME; DGS                | 46,XY,del(22)(q11.21q11.22).ish del(22)(q11.21q11.22)(TUPLE1-,N85A3+).arr[hg18] 22q11.21(17030682-19792611)x1                                                                                           | Male   |      |
| GM20022 | B-Lymphocyte | DUPLICATED CHROMOSOME                 | 46,XY,dup(3)(q21q29).ish dup(3)(q21q29)(wcp3+,D3S4560+).arr[hg18] 3q22.2q29(136044785-197137370)x3                                                                                                      | Male   |      |
| GM20027 | B-Lymphocyte | TURNER SYNDROME                       | 45,X.arr[hg18](X)x1,(Y)x0                                                                                                                                                                               | Female |      |
| GM20556 | B-Lymphocyte | ISODICENTRIC CHROMOSOME               | 47,XY,+idic(15)(q13).ish idic(15)(q13)(D15Z1++,D15S11++,GABRB3+).arr[hg18] Yq11.223q11.23(23920264-27079691)x2,15q11.1q13.3(18276329-30557740)x4                                                        | Male   | 2515 |

|         |              |                                   |                                                                                                                                               |        |  |
|---------|--------------|-----------------------------------|-----------------------------------------------------------------------------------------------------------------------------------------------|--------|--|
| GM21698 | B-Lymphocyte | CHROMOSOME DELETION               | 46,XY,del(6)(q26).ish del(6)(q26)(wcp6+,D62522-).arr[hg18] 6q26q27(162860228-170761408)x1                                                     | Male   |  |
| GM21699 | B-Lymphocyte | CHROMOSOME DELETION               | 46,XY,der(6)t(3;6)(p26;q26).ish der(6)t(3;6)(p26;q26)(wcp6+,D62522-,D3S4559+).arr[hg18] 3p26.3(35332-580373)x3,6q26q27(163580511-170824447)x1 | Male   |  |
| GM21887 | B-Lymphocyte | ANGELMAN SYNDROME; AS             | 46,XX,del(15)(q11q13).ish del(15)(q11q13)(D15Z1+,SNRPN-,[D15S10/UBE]-,GABRB3-,PML+).arr[hg18] 15q11.2q13.1(20224751-26500067)x1               | Female |  |
| GM22601 | B-Lymphocyte | WOLF-HIRSCHHORN SYNDROME; WHS     | 46,XY,del(4)(p15.2).arr[hg18] 4p16.3p15.2(55665-25591051)x1                                                                                   | Male   |  |
| GM22624 | B-Lymphocyte | POTOCKI-SHAFFER SYNDROME          | 46,XX,del(11)(p12p11.2).arr[hg18] 11p12p11.2(40433344-46031324)x1                                                                             | Female |  |
| GM22991 | B-Lymphocyte | CHROMOSOME 1P36 DELETION SYNDROME | 46,XX.ish del(1)(p36.32)(CEB108/T7-,SKI-,D1S3739+).arr[hg18] 1p36.32(742429-5215341)x1                                                        | Female |  |
